# Supplementary material for: Cx32 inhibits the autophagic effect of Nur77 in SH-SY5Y cells and rat brain with ischemic stroke
Source: Aging (Albany NY). 2021 Sep 22;13(18):22188–207. doi: 10.18632/aging.203526 (PMC8507301; doi:10.18632/aging.203526)
Supplement: Supplementary Figures [file aging-13-203526-s001.pdf]

## SUPPLEMENTARY FIGURES

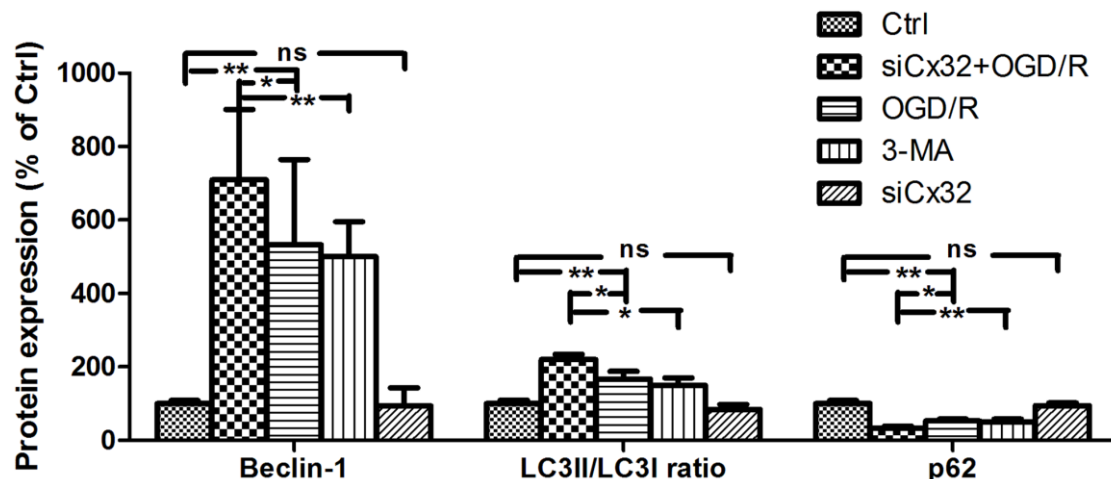

**Supplementary Figure 1. Inhibition of Cx32 activated autophagy after OGD/R injury.** Representative bands of Beclin1, LC3 and p62 protein in siCx32 cells after OGD/R. Variation in protein loading was determined by blotting with an anti- $\beta$ -actin antibody. Densitometric scanning of band intensities were calculated as means  $\pm$  SD ( $n = 3$ ). \*\* $p < 0.01$ , \* $p < 0.05$ .

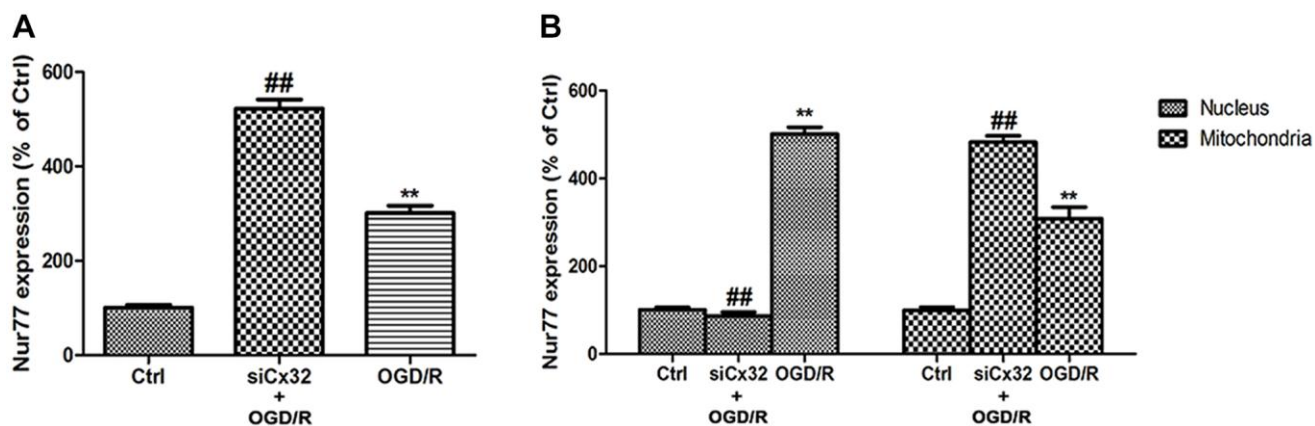

**Supplementary Figure 2. Nur77 translocated from nucleus to mitochondria after the inhibition of Cx32 following OGD/R injury.** (A) Representative bands of Nur77 protein in the cells after OGD/R. (B) Mitochondrial translocation of Nur77 was detected by Western blot after OGD/R. Mitochondria Nur77 expression was normalized against COX IV. Nucleus Nur77 expression was normalized against  $\alpha$ -tubulin expression. Variation in protein loading was determined by blotting with an anti- $\beta$ -actin antibody. Densitometric scanning of band intensities were calculated as means  $\pm$  SD ( $n = 3$ ). \*\* $p < 0.01$  vs. Ctrl group, ### $p < 0.01$  vs. OGD/R.
